# Supplementary material for: Molecular dynamics study of the archaeal aquaporin AqpM
Source: PubMed Central journal article supplement (PMC3287591; doi:10.1186/1471-2164-12-s4-s8), 2011-12-22
Supplement: 1471-2164-12-S4-S8-S1.pdf [file 1471-2164-12-S4-S8-S1.pdf]

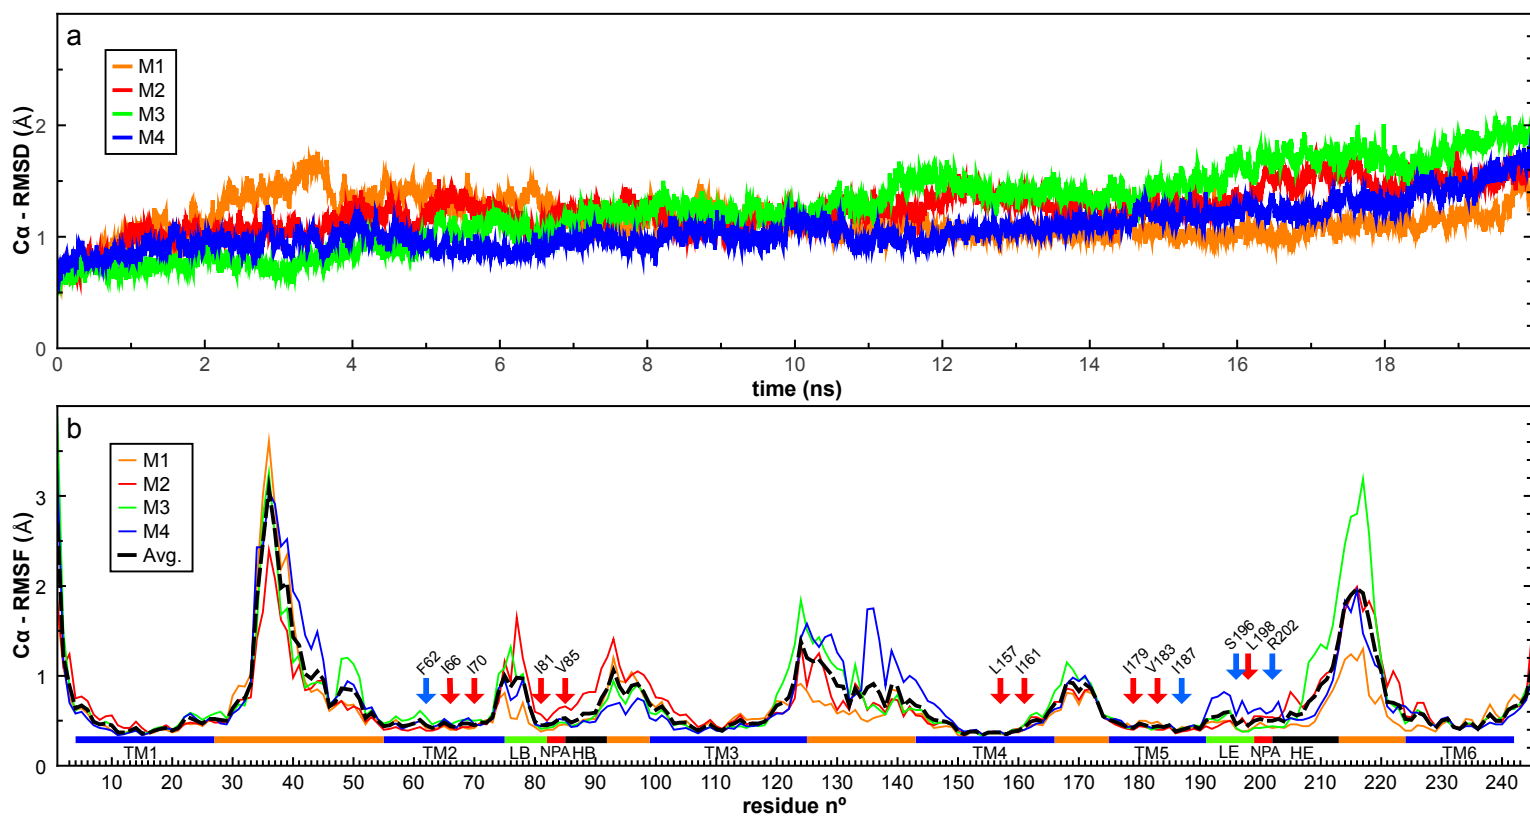

**Fig S1.  $C\alpha$ -RMSD and  $C\alpha$ -RMSF of the simulated AqpM tetramer.**

(a) Time evolution of  $C\alpha$ -RMSD for each AqpM monomer obtained from the 20ns production run. The last conformation obtained from the minimization-relaxation procedure (see methods) was used as reference structure for the measurement. (b)  $C\alpha$ -RMSF for each AqpM monomer obtained from the 20ns production run. Each coloured solid line represents a monomer. The dashed black line represents the average RMSF. The solid lines below the curves indicate secondary structure elements of AqpM ( blue = TM-helix; orange = loops; green = loops B and E; red = NPA motifs; black = helix B and E). Light blue arrows indicate residues that comprise the selectivity filter (S.F) of AqpM; red arrows indicate hydrophobic residues that line the AqpM pore.
